# Supplementary material for: Improved GNSS-R bi-static altimetry and independent digital elevation models of Greenland and Antarctica from TechDemoSat-1
Source: Copernicus journal article supplement (doi:10.5194/tc-14-1909-2020), 2020-06-15
Supplement: Supplementary file 1 [file tc-14-1909-2020-supplement.pdf]

Supplement of The Cryosphere, 14, 1909–1917, 2020  
<https://doi.org/10.5194/tc-14-1909-2020-supplement>  
© Author(s) 2020. This work is distributed under  
the Creative Commons Attribution 4.0 License.

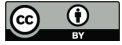

*Supplement of*

## **Improved GNSS-R bi-static altimetry and independent digital elevation models of Greenland and Antarctica from TechDemoSat-1**

**Jessica Cartwright et al.**

*Correspondence to:* Jessica Cartwright (jc1n15@noc.soton.ac.uk)

The copyright of individual parts of the supplement might differ from the CC BY 4.0 License.

## Contents

- Table S1
- Figure S2
- Figure S3

**Table S1:** Difference from *Slater et al.* [2018] DEM (top, Antarctic) and ESA CCI DEM (below, Greenland) shown in metres at different slope ranges. TechDemoSat-1 data produced according to methods in paper.

| Slope Range<br>(degrees) | Antarctic             |                     |                       | % of total<br>samples |
|--------------------------|-----------------------|---------------------|-----------------------|-----------------------|
|                          | Median difference (m) | Mean difference (m) | RMS difference<br>(m) |                       |
| 0.00-0.25                | 8.35                  | 8.12                | 36.90                 | 55.52                 |
| 0.25-0.50                | 10.26                 | 9.17                | 43.42                 | 23.02                 |
| 0.50-0.75                | 16.64                 | 18.22               | 58.71                 | 9.30                  |
| 0.75-1.00                | 19.19                 | 24.95               | 76.00                 | 4.24                  |
| >1.00                    | -27.96                | 14.38               | 176.34                | 7.92                  |
| Slope Range<br>(degrees) | Greenland             |                     |                       | % of total<br>samples |
|                          | Median difference (m) | Mean difference (m) | RMS difference<br>(m) |                       |
| 0.00-0.25                | 9.26                  | 9.22                | 30.07                 | 66.83                 |
| 0.25-0.50                | 30.93                 | 34.91               | 66.45                 | 11.43                 |
| 0.50-0.75                | 39.32                 | 41.15               | 102.35                | 3.20                  |
| 0.75-1.00                | 38.87                 | 28.77               | 131.29                | 2.00                  |
| >1.00                    | -92.98                | -190.10             | 391.28                | 16.54                 |

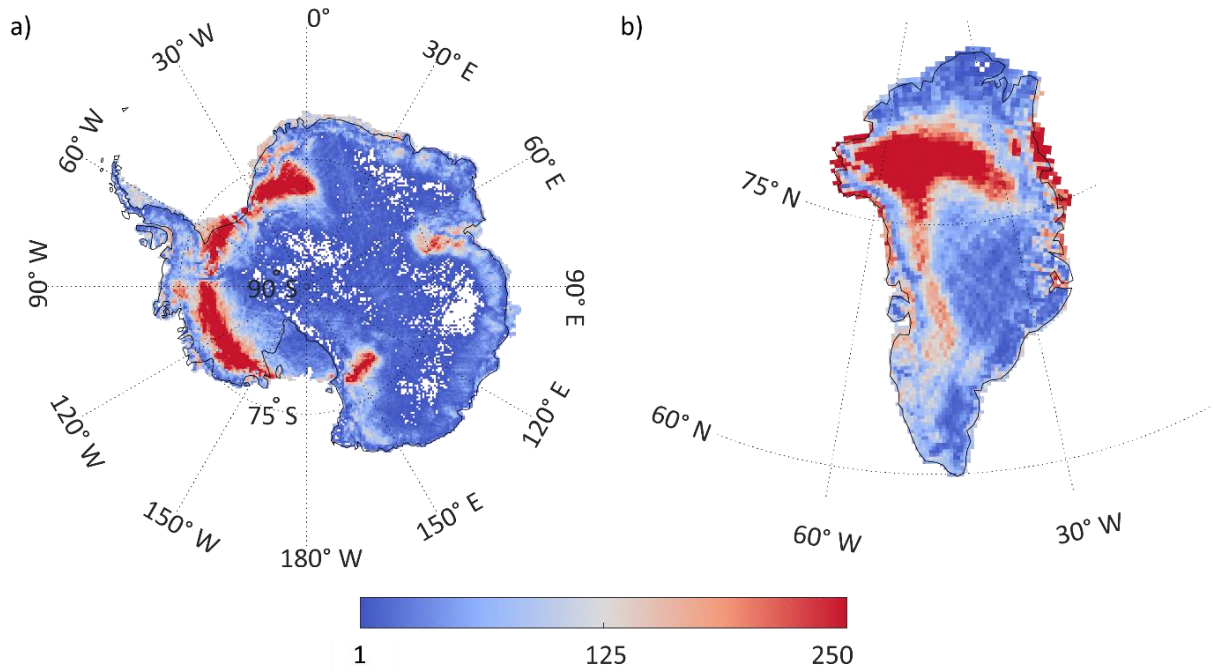

**Figure S1:** Counts of measurements per 25 km grid cell over Antarctica (left) and Greenland (right).

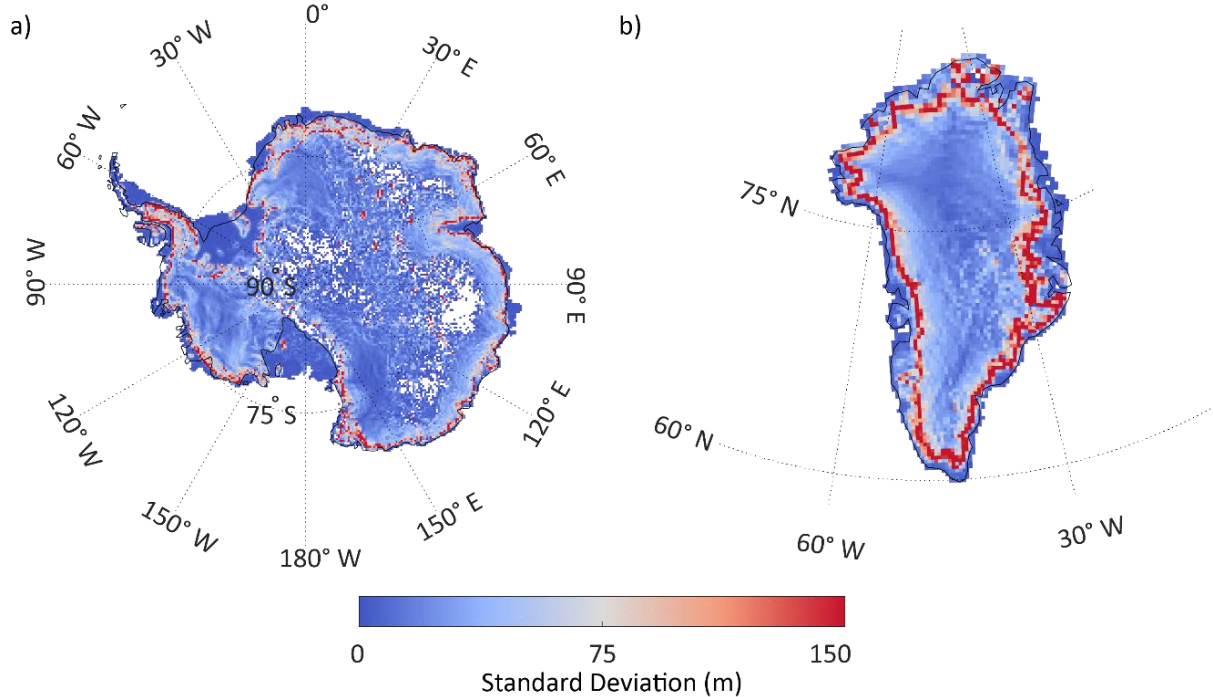

**Figure S2:** Standard deviation of measurements in metres per 25 km grid cell over Antarctica (left) and Greenland (right).

Slater, T., A. Shepherd, M. McMillan, A. Muir, L. Gilbert, A. E. Hogg, H. Konrad, and T. Parrinello (2018), A new digital elevation model of Antarctica derived from CryoSat-2 altimetry, *The Cryosphere*, 12(4), 1551-1562, doi:10.5194/tc-12-1551-2018.
